# Supplementary material for: Isolation and characterisation of irinans, androstane-type withanolides from Physalis peruviana L.
Source: publisher site journal article supplement (doi:10.3762/bjoc.15.196), 2019-08-23
Supplement: Additional file 1 [file 1860-5397-15-196-S1.pdf]

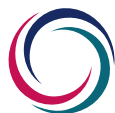

## Supporting Information

for

### Isolation and characterisation of irinans, androstane-type withanolides from *Physalis peruviana* L.

Annika Stein, Dave Compera, Bianka Karge, Mark Brönstrup and Jakob Franke

*Beilstein J. Org. Chem.* **2019**, *15*, 2003–2012. doi:10.3762/bjoc.15.196

**NMR, MS, UV and IR spectra of irinan A (2) and irinan B (3).  
NMR data of withanolide E (4), withanolide F (5) and  
perulactone H (6)**

Figure S1. HRESIMS spectrum of **2**

Figure S2.  $^1\text{H}$  NMR spectrum of **2** in  $\text{CDCl}_3$  at 298.0 K (500 MHz)

Figure S3.  $^{13}\text{C}$  NMR spectrum of **2** in  $\text{CDCl}_3$  at 298.0 K (125 MHz)

Figure S4.  $^1\text{H}$ ,  $^1\text{H}$  COSY spectrum of **2** in  $\text{CDCl}_3$  at 298.0 K (500 MHz)

Figure S5. HSQC spectrum of **2** in  $\text{CDCl}_3$  at 298.0 K (500 MHz; 125 MHz)

Figure S6. HMBC spectrum of **2** in  $\text{CDCl}_3$  at 298.0 K (500 MHz; 125 MHz)

Figure S7. NOESY spectrum of **2** in  $\text{CDCl}_3$  at 298.0 K (500 MHz)

Figure S8. IR spectrum of **2**

Figure S9. UV-vis spectrum of **2** in MeOH

Figure S10. HRESIMS spectrum of **3**

Figure S11.  $^1\text{H}$  NMR spectrum of **3** in  $\text{CDCl}_3$  at 298.0 K (500 MHz)

Figure S12.  $^{13}\text{C}$  NMR spectrum of **3** in  $\text{CDCl}_3$  at 298.0 K (125 MHz)

Figure S13.  $^1\text{H}$ ,  $^1\text{H}$  COSY spectrum of **3** in  $\text{CDCl}_3$  at 298.0 K (500 MHz)

Figure S14. HSQC spectrum of **3** in  $\text{CDCl}_3$  at 298.0 K (500 MHz; 125 MHz)

Figure S15. HMBC spectrum of **3** in  $\text{CDCl}_3$  at 298.0 K (500 MHz; 125 MHz)

Figure S16. NOESY spectrum of **3** in  $\text{CDCl}_3$  at 298.0 K (500 MHz)

Figure S17. IR spectrum of **3**

Figure S18. UV-vis spectrum of **3** in MeOH

Figure S19. Origin of an unusual dddddd multiplet.

Figure S20. Proposed biosynthetic precursors of irinan A (**2**), B (**3**) and the previously reported androwithanolide cinedione (**8**).

Figure S21. Intrinsic reactivity of 4 $\beta$ -hydroxywithanolide E (**1**) in oxidative conditions.

Table S1.  $^1\text{H}$  NMR data ( $\text{CDCl}_3$ , 400 MHz, 298 K) of withanolide E (**4**), withanolide F (**5**) and perulactone H (**6**) in comparison with literature data ( $\delta$  in ppm,  $J$  in Hz).

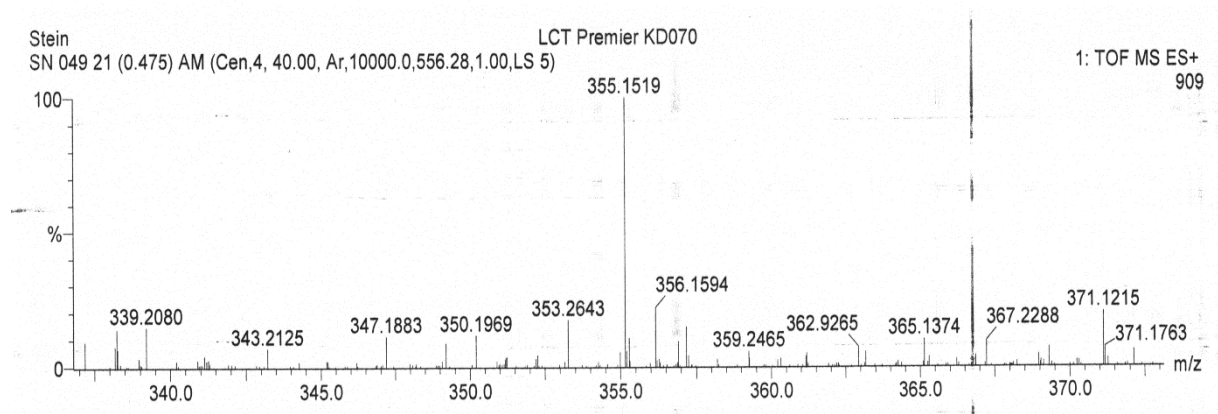

**Figure S1.** HRESIMS spectrum of **2**.

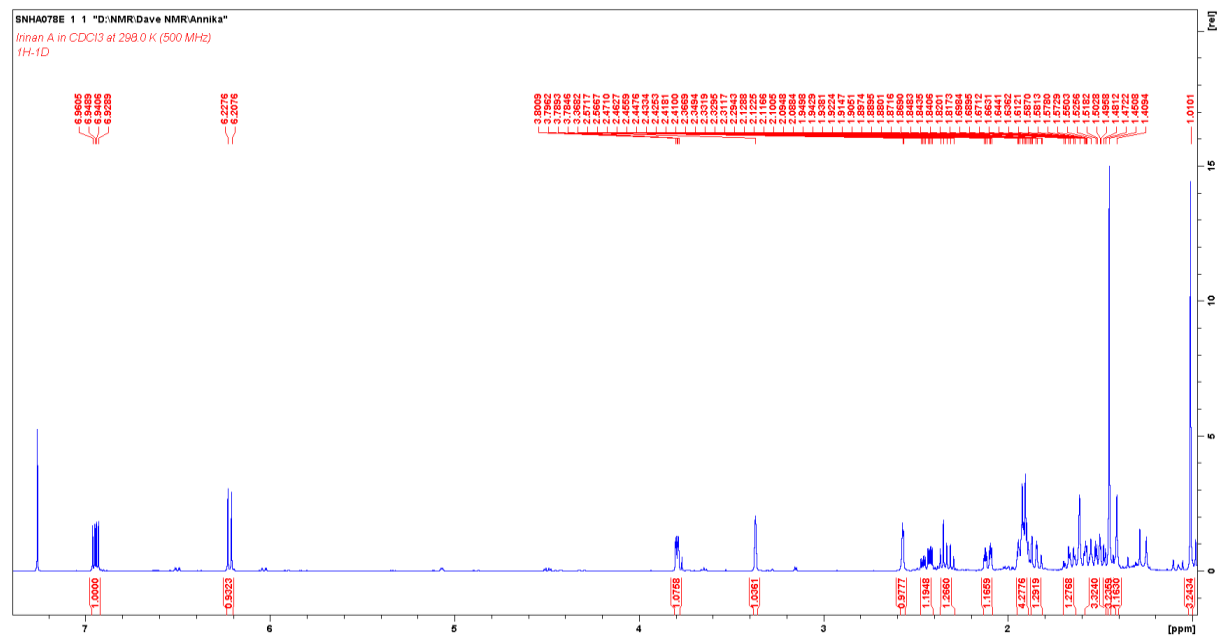

**Figure S2.** <sup>1</sup>H NMR spectrum of **2** in CDCl<sub>3</sub> at 298.0 K (500 MHz).

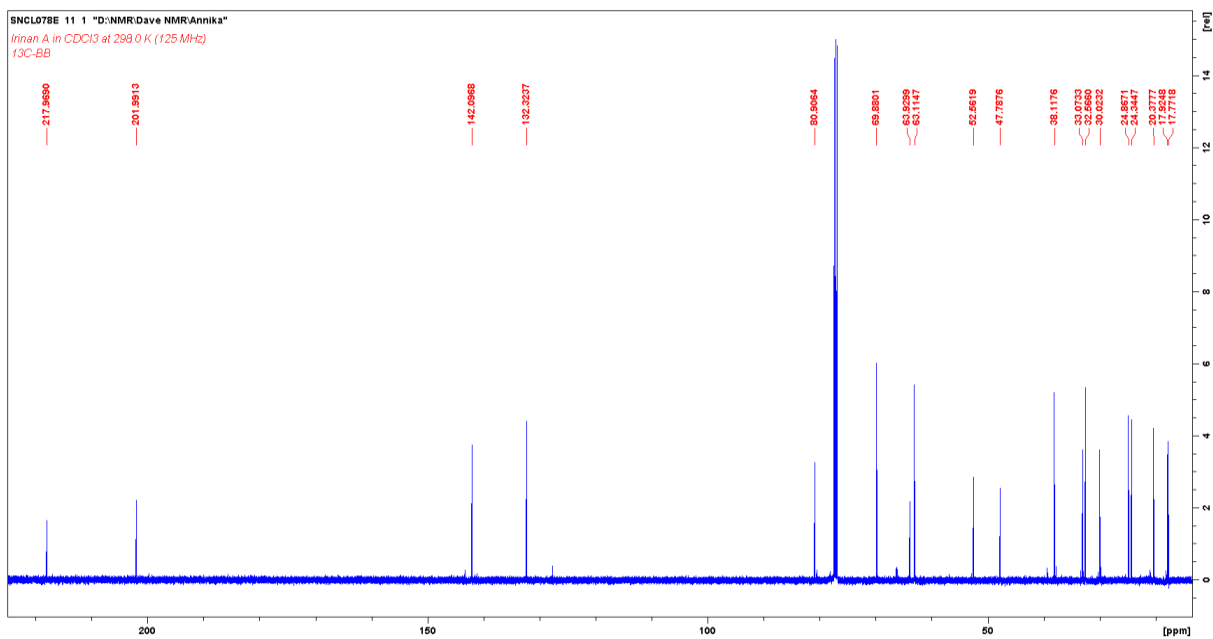

**Figure S3.**  $^{13}\text{C}$  NMR spectrum of **2** in  $\text{CDCl}_3$  at 298.0 K (125 MHz).

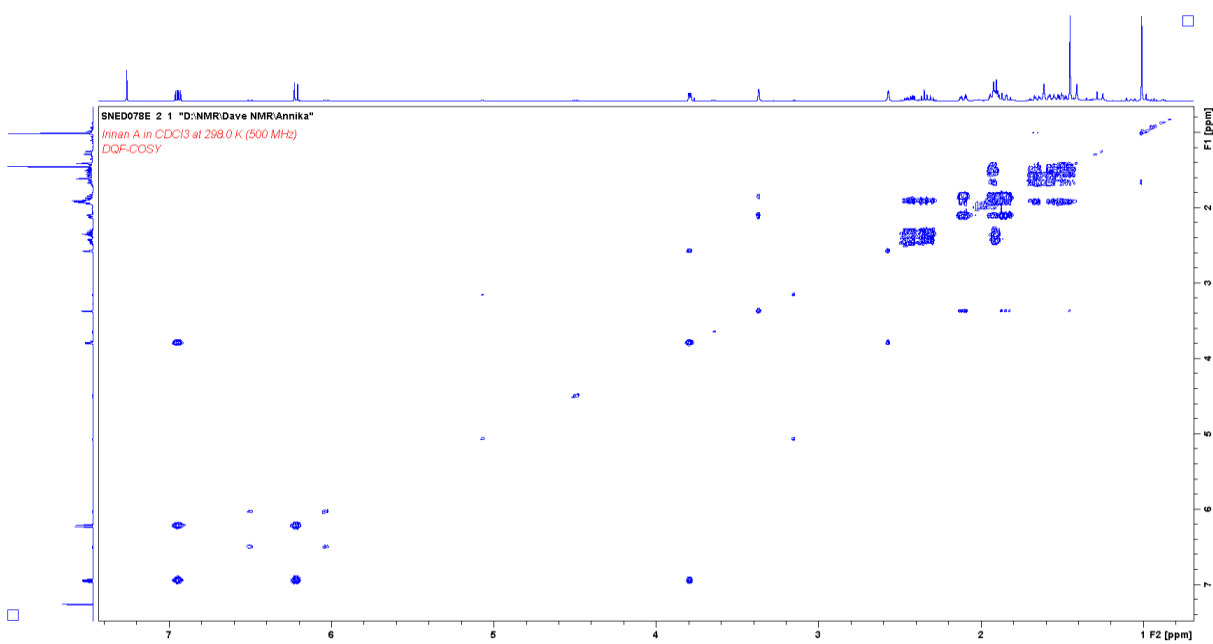

**Figure S4.**  $^1\text{H}$ ,  $^1\text{H}$  COSY spectrum of **2** in  $\text{CDCl}_3$  at 298.0 K (500 MHz).

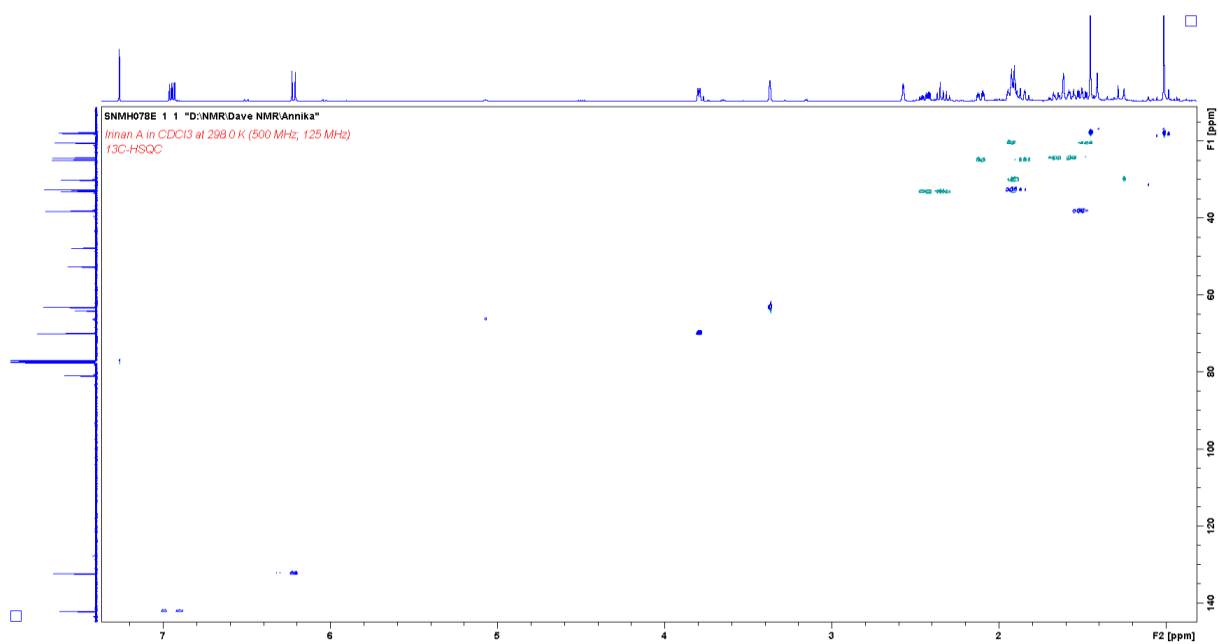

**Figure S5.** HSQC spectrum of **2** in  $\text{CDCl}_3$  at 298.0 K (500 MHz; 125 MHz).

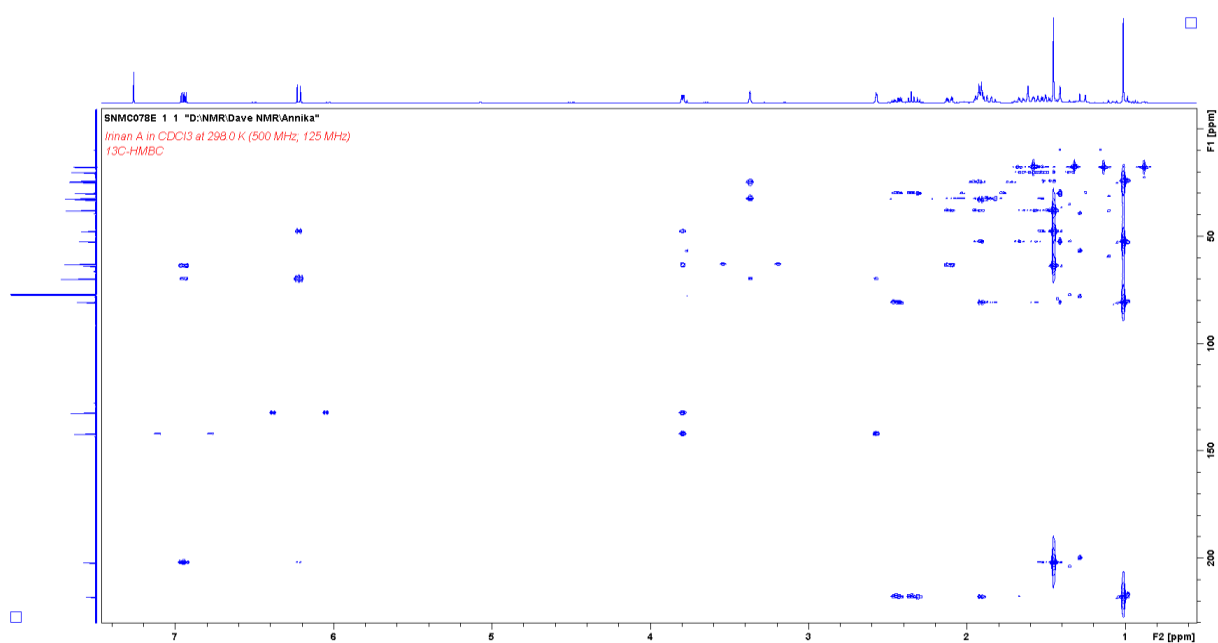

**Figure S6.** HMBC spectrum of **2** in  $\text{CDCl}_3$  at 298.0 K (500 MHz; 125 MHz).

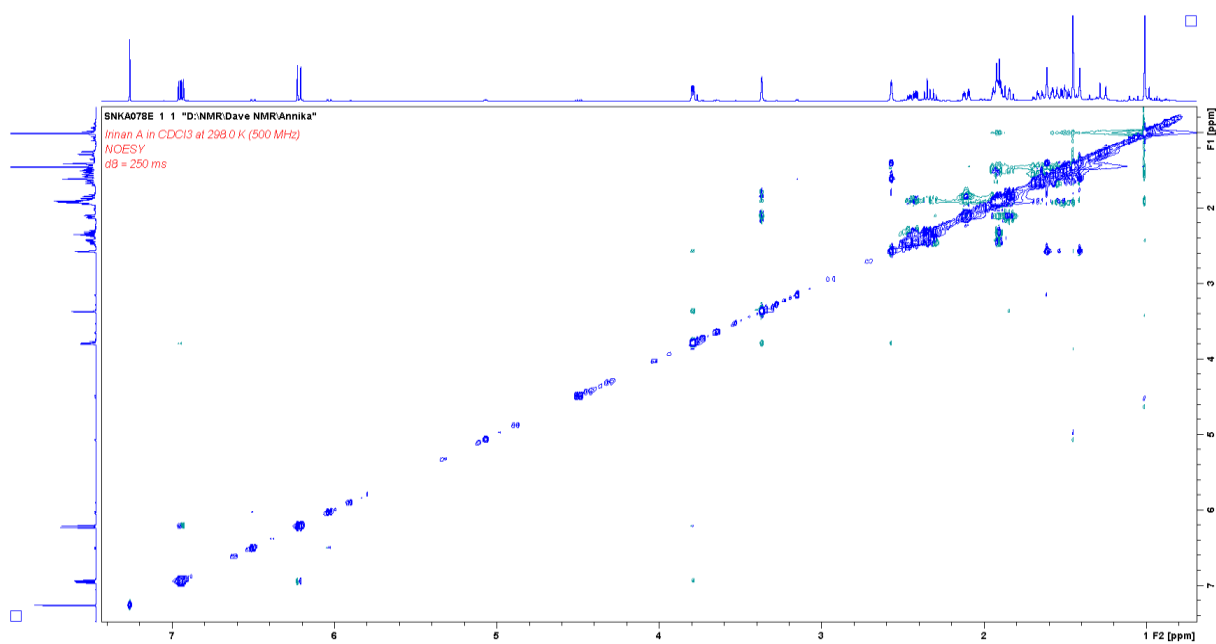

**Figure S7.** NOESY spectrum of **2** in  $\text{CDCl}_3$  at 298.0 K (500 MHz).

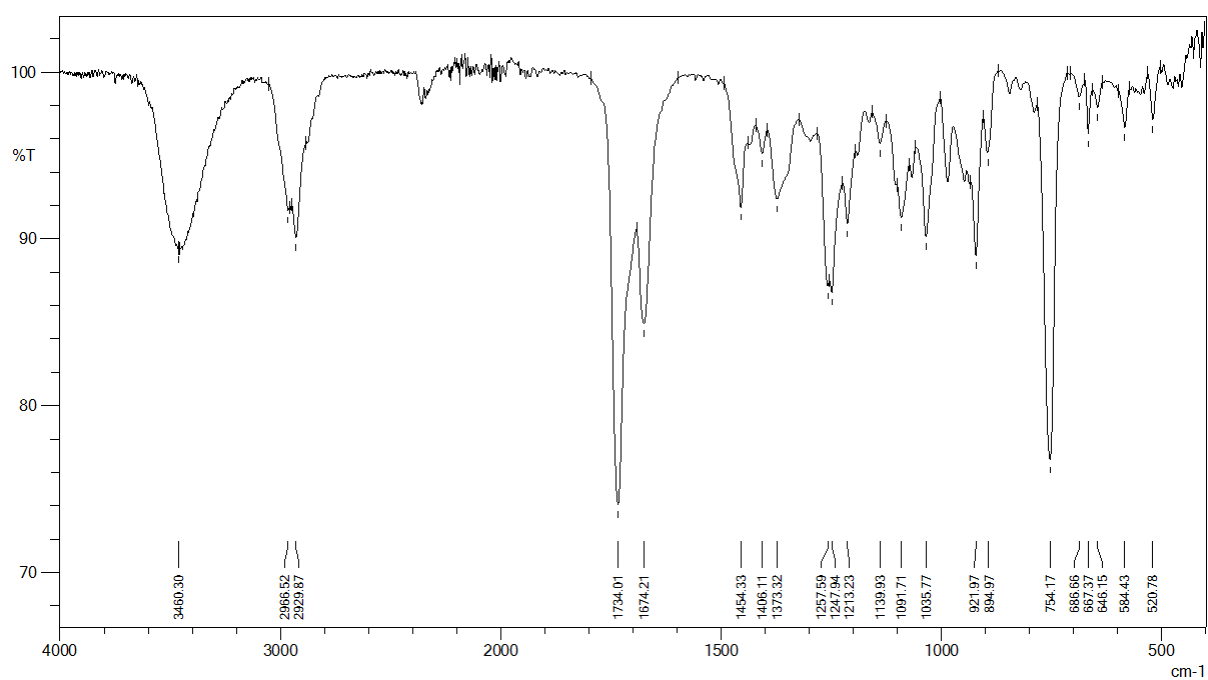

**Figure S8.** IR spectrum of **2**.

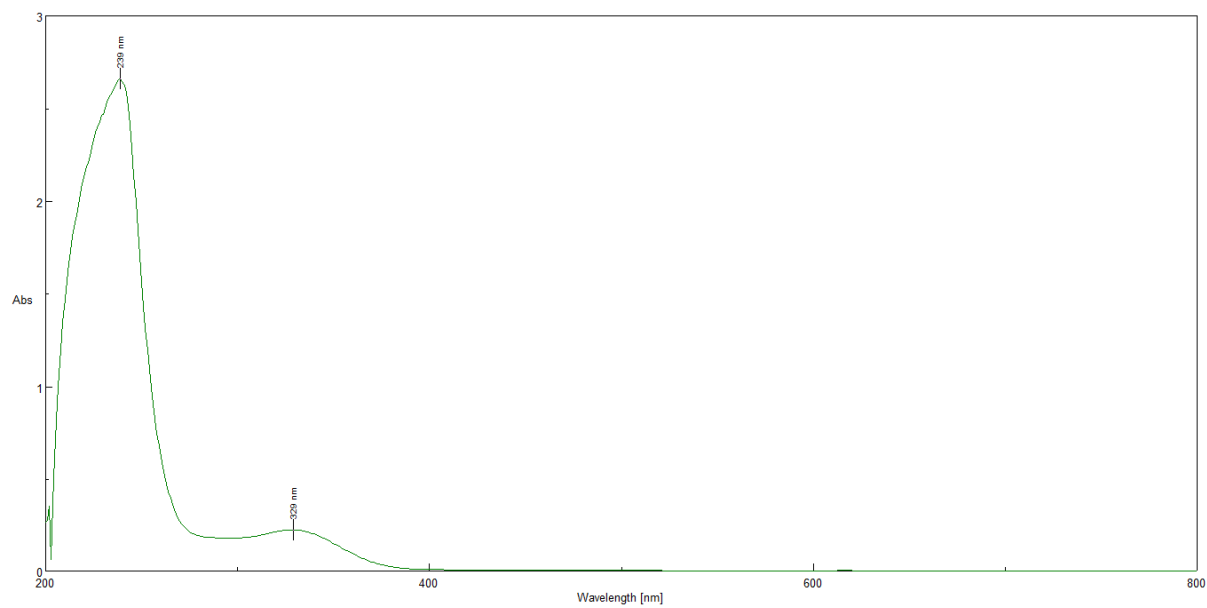

**Figure S9.** UV-vis spectrum of **2** in MeOH.

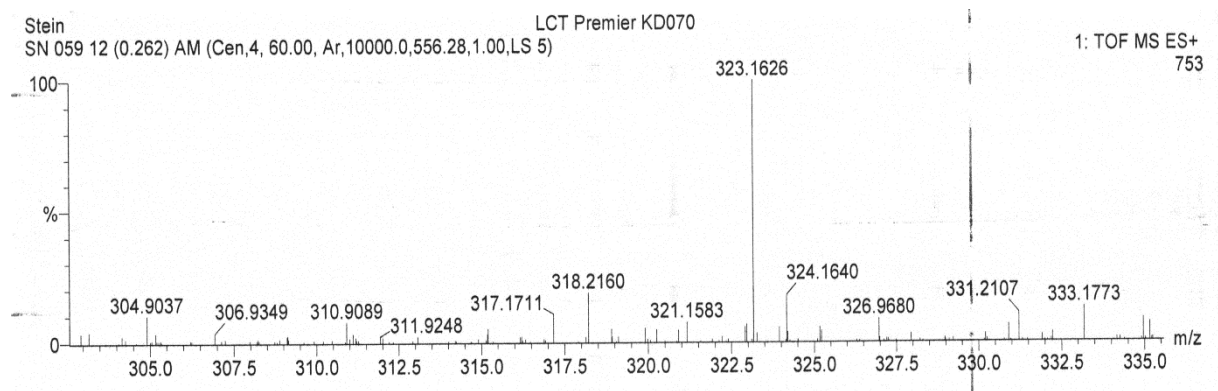

**Figure S10.** HRESIMS spectrum of **3**.

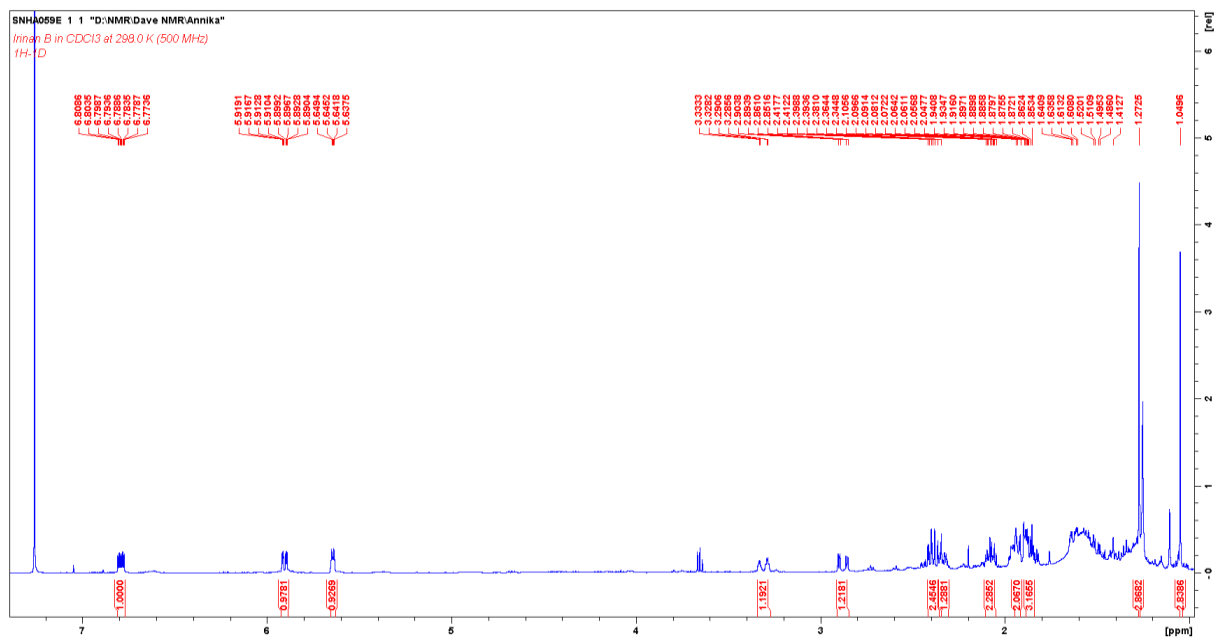



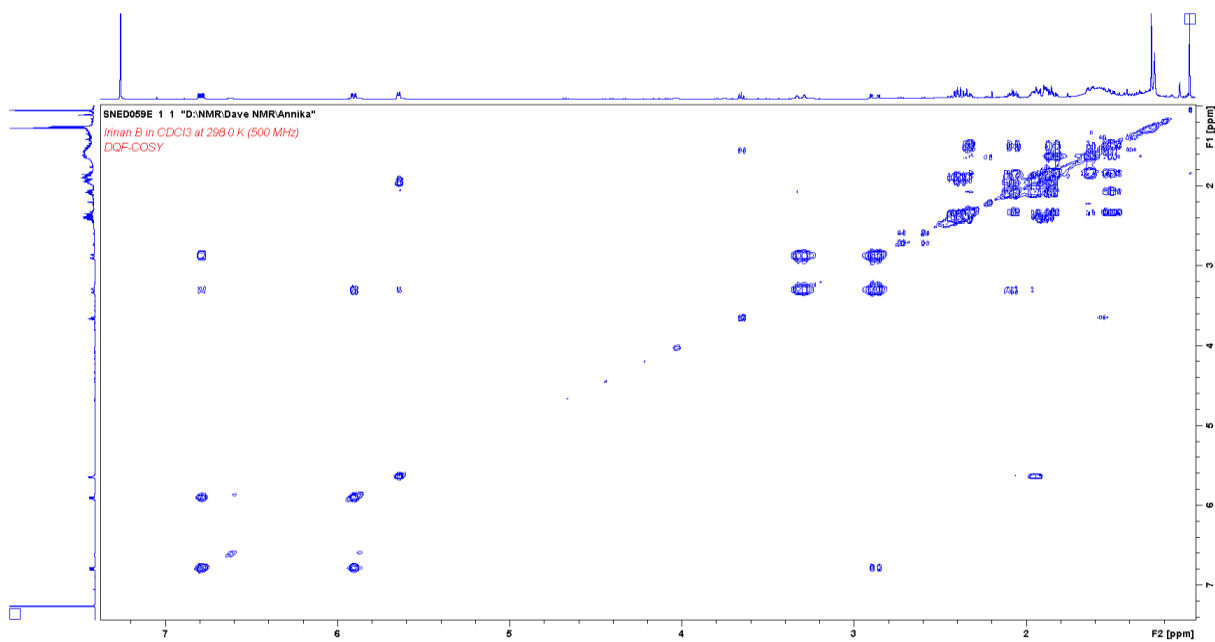

**Figure S13.** <sup>1</sup>H-<sup>1</sup>H COSY spectrum of **3** in CDCl<sub>3</sub> at 298.0 K (500 MHz).

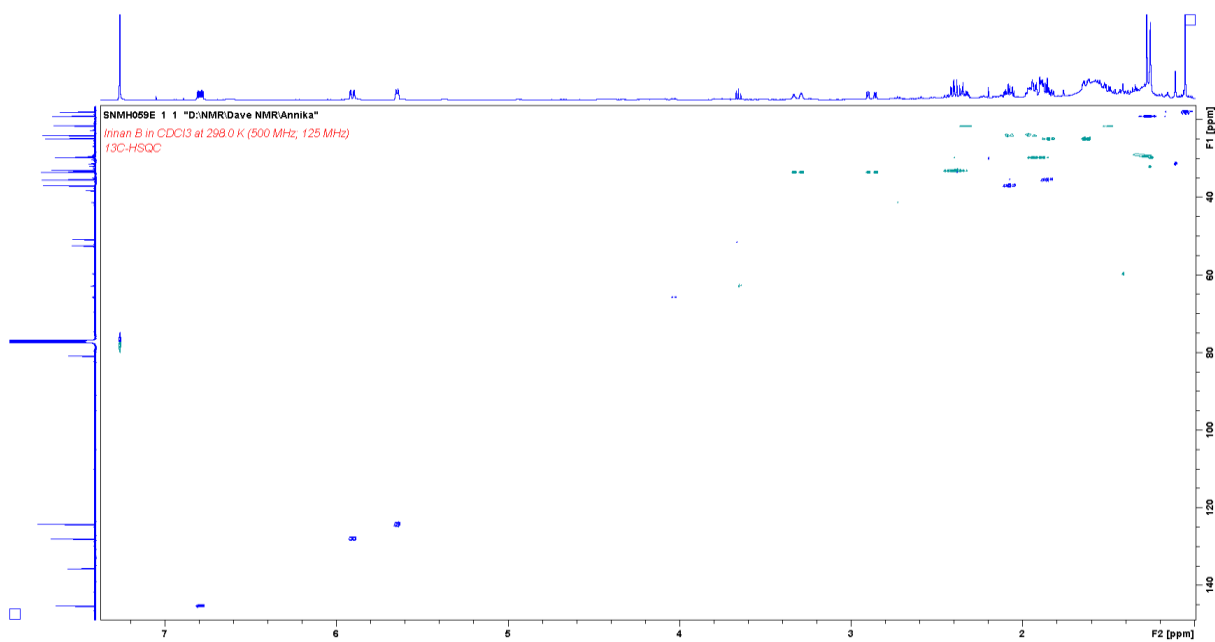

**Figure S14.** HSQC spectrum of **3** in CDCl<sub>3</sub> at 298.0 K (500 MHz; 125 MHz).

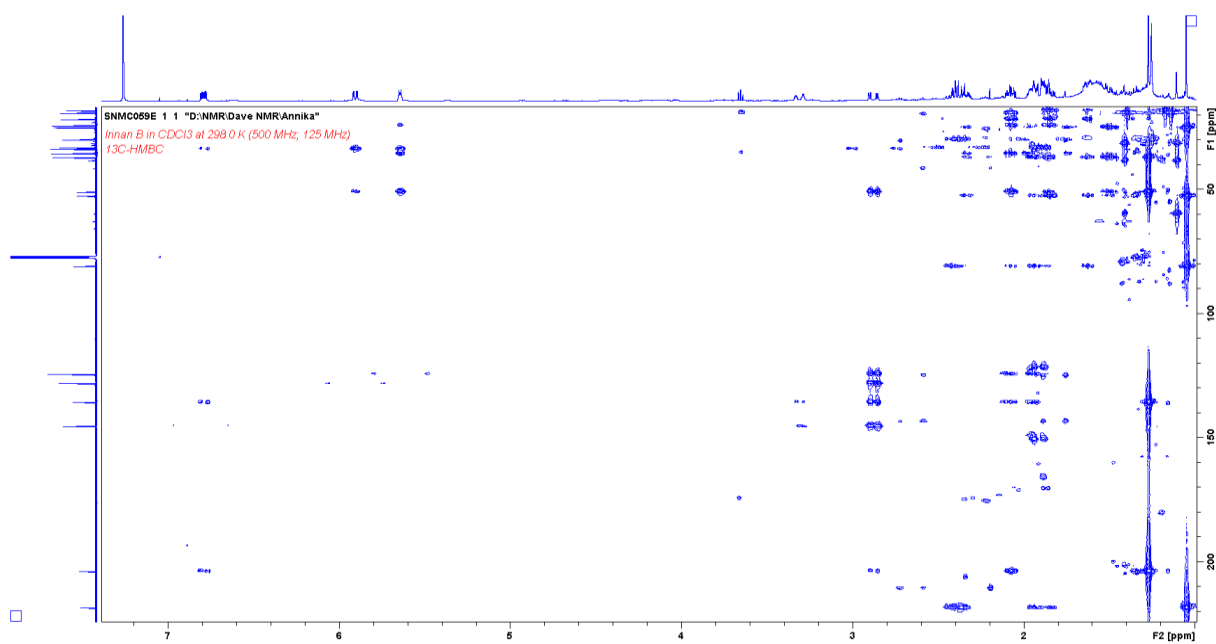

**Figure S15.** HMBC spectrum of **3** in CDCl<sub>3</sub> at 298.0 K (500 MHz; 125 MHz).

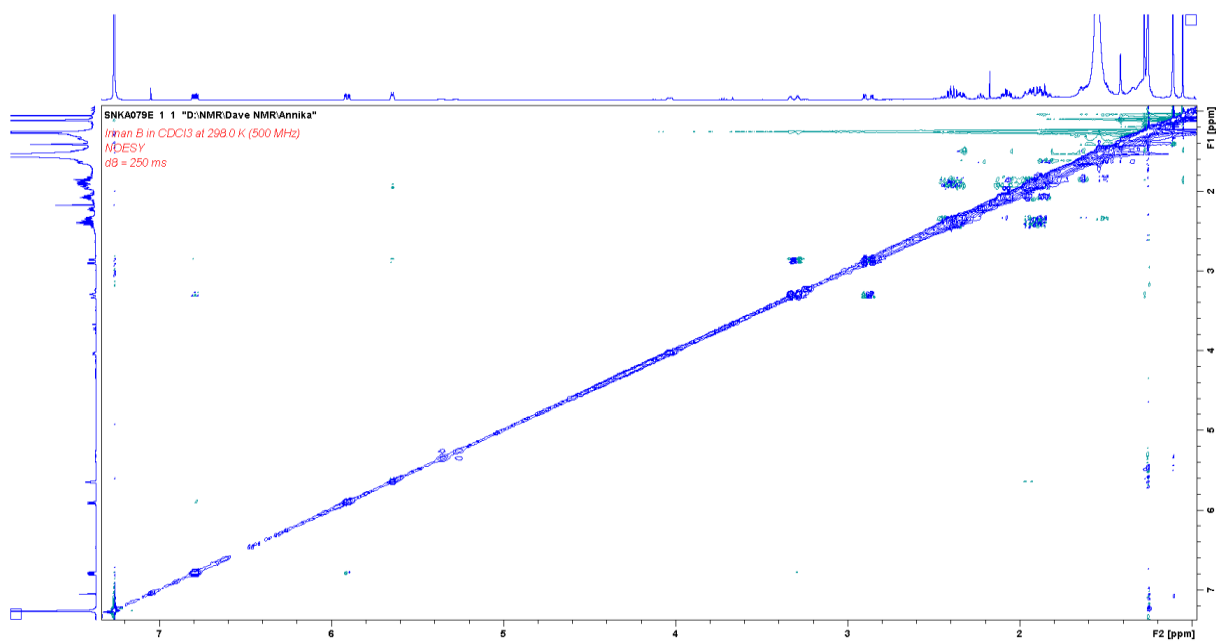

**Figure S16.** NOESY spectrum of **3** in CDCl<sub>3</sub> at 298.0 K (500 MHz).

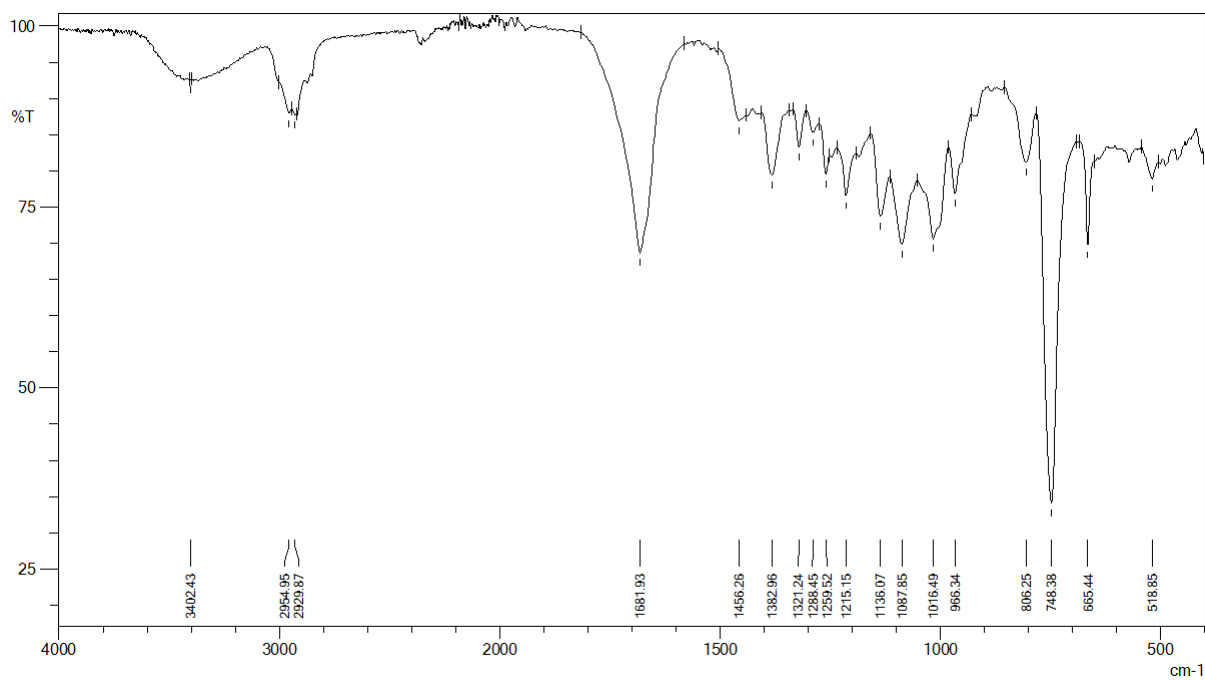

**Figure S17.** IR spectrum of **3**.

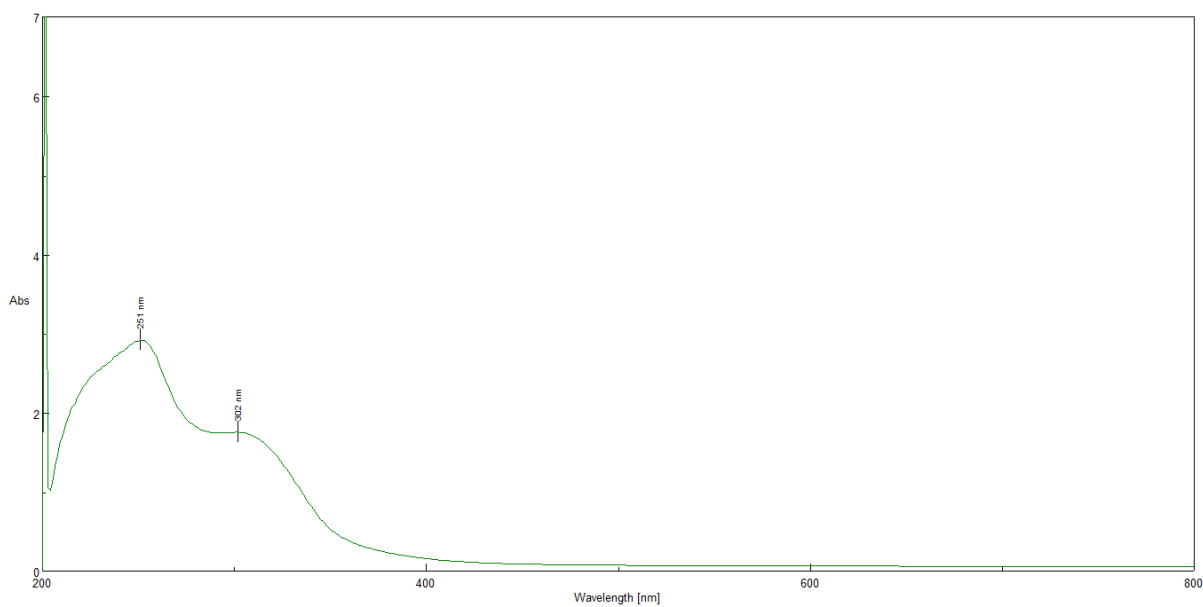

**Figure S18.** UV-vis spectrum of **3** in MeOH.

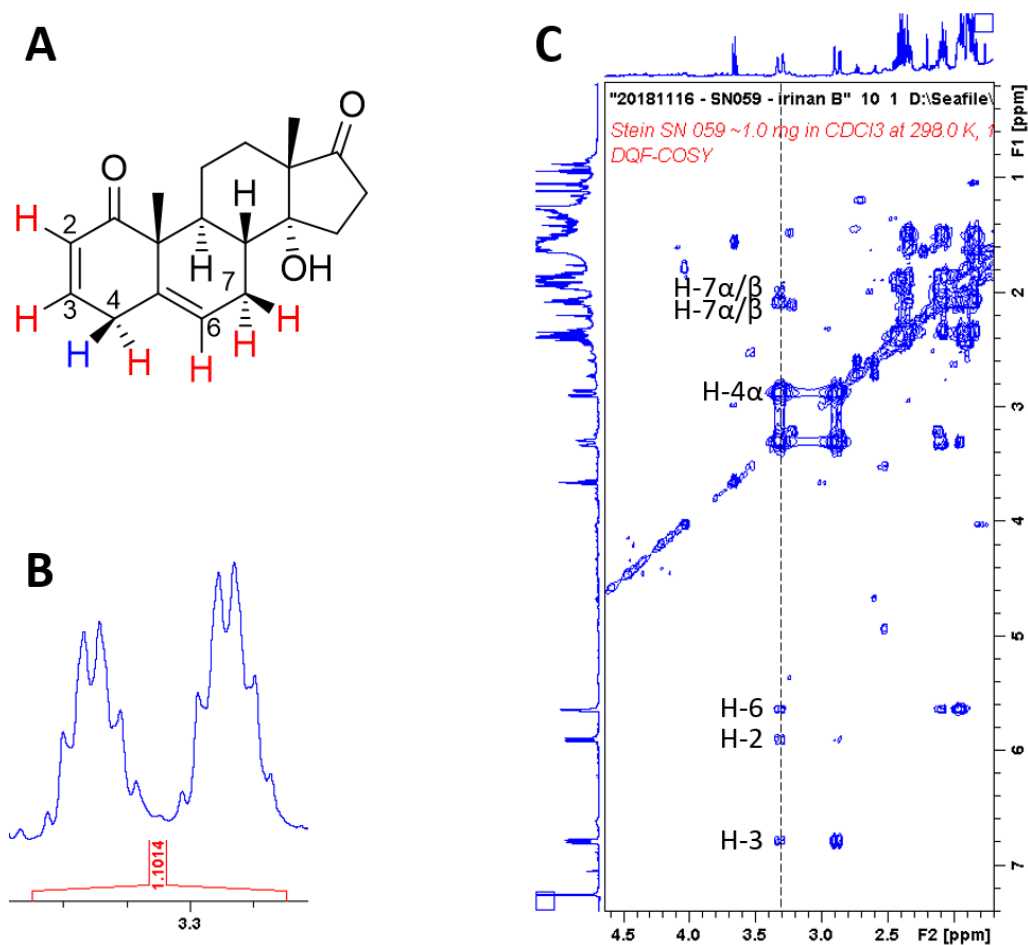

**Figure S19.** Origin of an unusual dddddd multiplet. A) Coupling partners (red) of H-4 $\beta$  (blue) in irinan B (**3**). B) H-4 $\beta$  appears as a dsext (expected for a sextet 1:5:10:10:5:1) in a  $^1\text{H}$  NMR spectrum (500 MHz,  $\text{CDCl}_3$ , 298 K). C) COSY analysis reveals  $^2J$  coupling to H-4 $\alpha$  (21.3 Hz) and five additional correlations (which must be  $\approx 2.8$  Hz to explain the sextet).

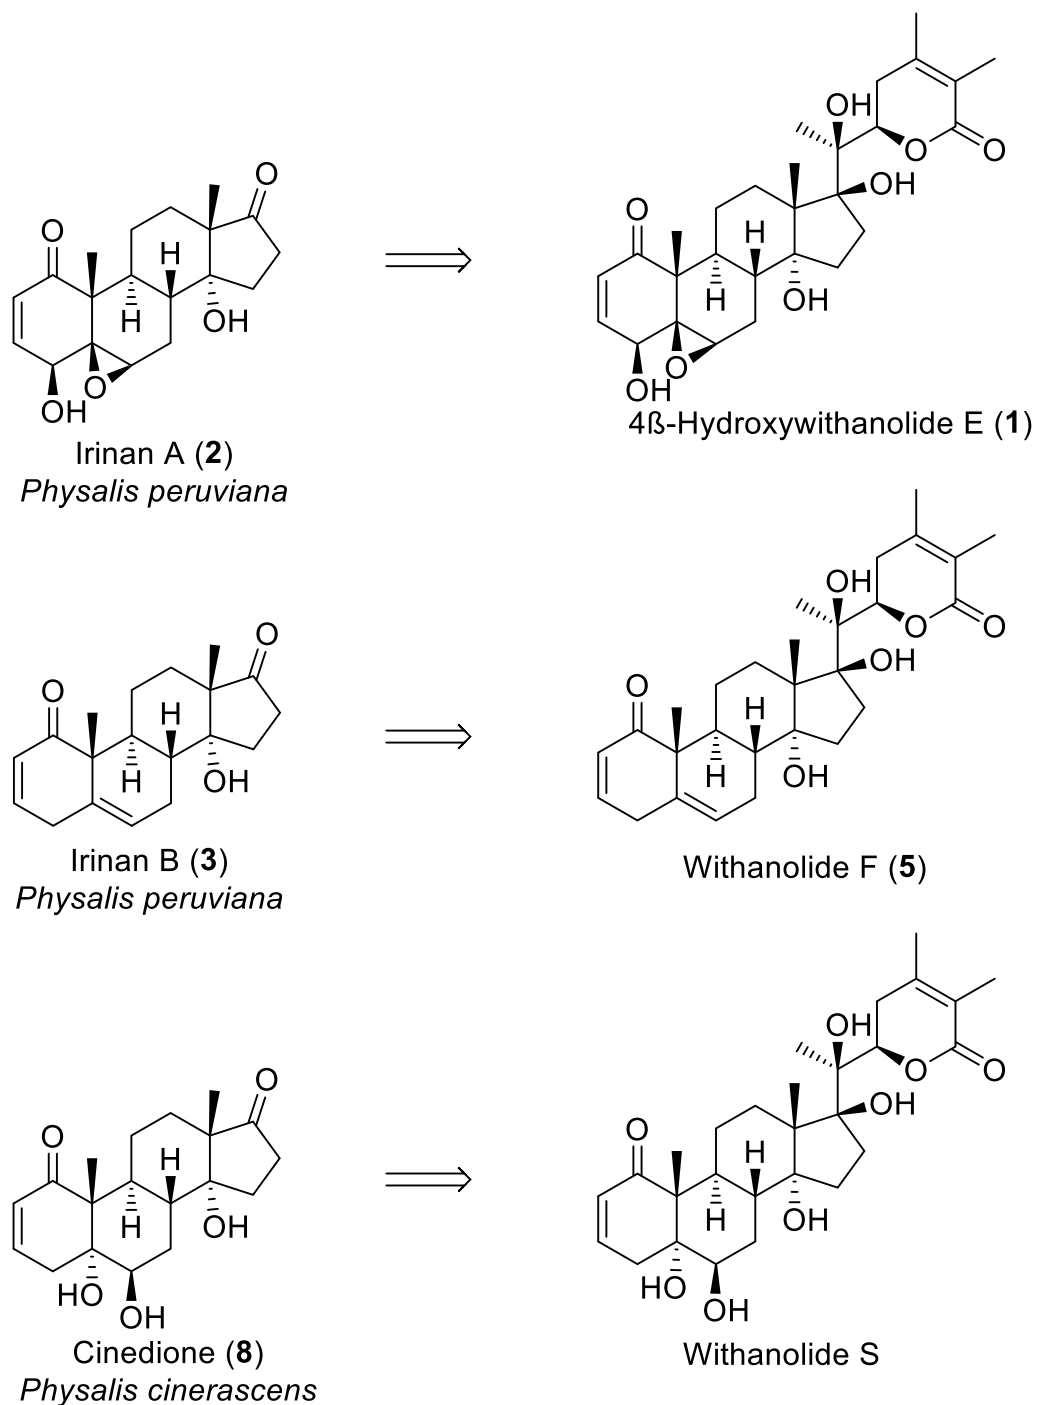

**Figure S20.** Proposed biosynthetic precursors of irinan A (2), B (3) and the previously reported androwithanolide cinedione (8).

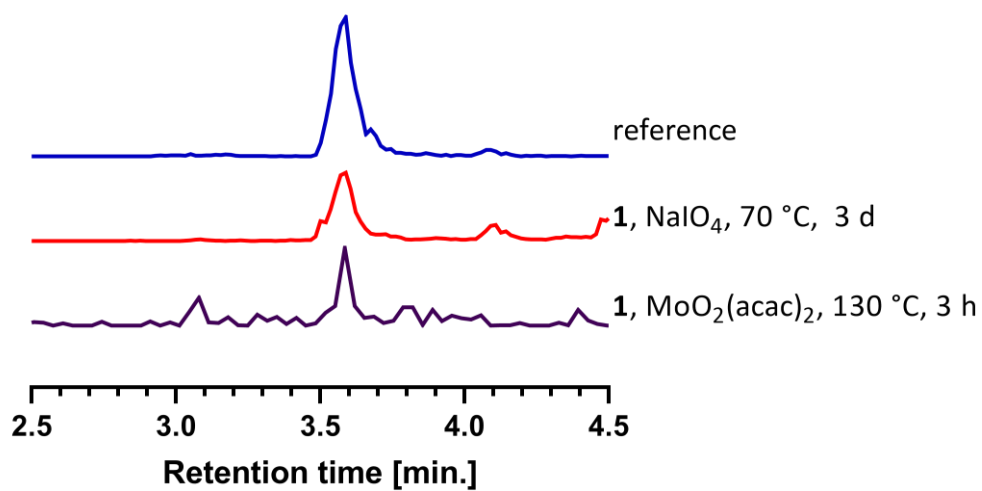

**Figure S21.** Intrinsic reactivity of 4β-hydroxywithanolide E (**1**) in oxidative conditions. Formation of irinan A (**2**) as judged by extracted ion chromatograms of  $m/z$  315  $[\text{M} + \text{H} - \text{H}_2\text{O}]^+$  in comparison to an authentic irinan A (**2**) reference.

**Table S1.**  $^1\text{H}$  NMR data ( $\text{CDCl}_3$ , 400 MHz, 298 K) of withanolide E (**4**), withanolide F (**5**) and perulactone H (**6**) in comparison with literature data ( $\delta$  in ppm,  $J$  in Hz).

|      | 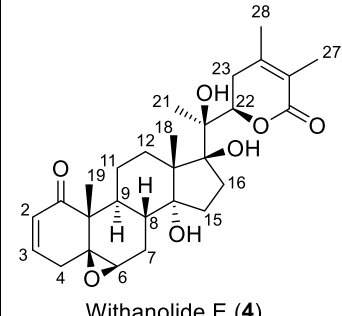<br>Withanolide E ( <b>4</b> ) |                              | <br>Withanolide F ( <b>5</b> ) |                                                     | <br>Perulactone H ( <b>6</b> ) |                                                     |
|------|-----------------------------------------------------------------------------------------------------------------|------------------------------|-----------------------------------------------------------------------------------------------------------------|-----------------------------------------------------|-------------------------------------------------------------------------------------------------------------------|-----------------------------------------------------|
| Atom | $^1\text{H}$                                                                                                    | reference [1]                | $^1\text{H}$                                                                                                    | reference [1]                                       | $^1\text{H}$                                                                                                      | reference [1]                                       |
| H-2  | 6.03 dd<br>(10.1, 2.9)                                                                                          | 6.02 dd<br>(10.1, 2.8)       | 5.86 dd<br>(10.0, 2.0)                                                                                          | 5.86 br dd<br>(9.9, 1.8)                            | 5.91 dd (9.9,<br>2.1)                                                                                             | 5.90 dd<br>(9.9, 1.7)                               |
| H-3  | 6.81 ddd<br>(10.2, 6.4,<br>2.4)                                                                                 | 6.81 ddd<br>(10.1, 6.4, 2.8) | 6.76 ddd<br>(10.0, 5.0,<br>2.5)                                                                                 | 6.76 ddd<br>(9.9, 4.6, 2.3)                         | 6.79 ddd<br>(10.1, 4.8,<br>2.5)                                                                                   | 6.79 ddd<br>(9.9, 4.9, 2.3)                         |
| H-4  | n.d. <sup>a</sup>                                                                                               | not reported                 | 3.27 br dd<br>(21.4, 1.7)<br>2.83 dd<br>(21.1, 5.0)                                                             | 3.27 br dd<br>(21.1, 2.3)<br>2.83 dd<br>(21.1, 4.6) | 3.30 br d<br>(21.0)<br>2.86 dd<br>(21.2, 4.3)                                                                     | 3.30 br dd<br>(21.2, 2.3)<br>2.87 dd<br>(21.2, 4.9) |
| H-6  | 3.18 br s                                                                                                       | 3.18 br s                    | 5.61 m                                                                                                          | 5.60 m                                              | 5.61 m                                                                                                            | 5.61 m                                              |
| H-7  | n.d. <sup>a</sup>                                                                                               | not reported                 | n.d. <sup>a</sup>                                                                                               | not reported                                        | n.d. <sup>a</sup>                                                                                                 | 1.86-1.95 m                                         |
| H-8  | n.d. <sup>a</sup>                                                                                               | not reported                 | n.d. <sup>a</sup>                                                                                               | not reported                                        | n.d. <sup>a</sup>                                                                                                 | 1.92 m                                              |
| H-9  | n.d. <sup>a</sup>                                                                                               | not reported                 | n.d. <sup>a</sup>                                                                                               | not reported                                        | n.d. <sup>a</sup>                                                                                                 | 2.13 m                                              |
| H-11 | n.d. <sup>a</sup>                                                                                               | not reported                 | n.d. <sup>a</sup>                                                                                               | not reported                                        | n.d. <sup>a</sup>                                                                                                 | 2.36 m, 1.65 m                                      |
| H-12 | n.d. <sup>a</sup>                                                                                               | not reported                 | n.d. <sup>a</sup>                                                                                               | not reported                                        | n.d. <sup>a</sup>                                                                                                 | 2.34 m, 1.58 m                                      |
| H-15 | n.d. <sup>a</sup>                                                                                               | not reported                 | n.d. <sup>a</sup>                                                                                               | not reported                                        | n.d. <sup>a</sup>                                                                                                 | 1.77 m, 1.62 m                                      |
| H-16 | n.d. <sup>a</sup>                                                                                               | not reported                 | n.d. <sup>a</sup>                                                                                               | not reported                                        | n.d. <sup>a</sup>                                                                                                 | 2.63 ddd<br>(15.2, 10.9,<br>1.7)<br>1.88 m          |
| H-18 | 1.09 s                                                                                                          | 1.09 s                       | 1.13 s                                                                                                          | 1.13 s                                              | 0.99 s                                                                                                            | 0.99 s                                              |
| H-19 | 1.24 s                                                                                                          | 1.24 s                       | 1.24 s                                                                                                          | 1.23 s                                              | 1.27 s                                                                                                            | 1.27 s                                              |
| H-21 | 1.41 s                                                                                                          | 1.41 s                       | 1.43 s                                                                                                          | 1.42 s                                              | 1.27 s                                                                                                            | 1.27 s                                              |
| H-22 | 4.89 dd<br>(11.4, 4.8)                                                                                          | 4.89 dd<br>(11.5, 5.1)       | 4.95 dd<br>(9.9, 6.6)                                                                                           | 4.94 dd<br>(9.4, 6.4)                               | 3.74 dd<br>(10.5, 2.1)                                                                                            | 3.74 d<br>(10.3)                                    |
| H-23 | 2.51 m                                                                                                          | 2.51 m                       | n.d. <sup>a</sup>                                                                                               | not reported                                        | n.d. <sup>a</sup>                                                                                                 | 1.79 m, 1.62 m                                      |
| H-24 | -                                                                                                               | -                            | -                                                                                                               | -                                                   | n.d. <sup>a</sup>                                                                                                 | 2.78 m                                              |
| H-25 | -                                                                                                               | -                            | -                                                                                                               | -                                                   | n.d. <sup>a</sup>                                                                                                 | 2.68 m                                              |
| H-27 | 1.88 s                                                                                                          | 1.88 s                       | 1.89 s                                                                                                          | 1.89 s                                              | 1.20 d (7.6)                                                                                                      | 1.20 d (7.5)                                        |
| H-28 | 1.94 s                                                                                                          | 1.94 s                       | 1.95 s                                                                                                          | 1.94 s                                              | 4.48 dd<br>(9.2, 7.2)<br>4.11 dd<br>(9.0, 8.4)                                                                    | 4.48 dd<br>(9.2, 7.2)<br>4.11 dd<br>(9.2, 9.2)      |

<sup>a</sup> not determined using  $^1\text{H}$  NMR data

## Supporting references

- Ozawa, M.; Morita, M.; Hirai, G.; Tamura, S.; Kawai, M.; Tsuchiya, A.; Oonuma, K.; Maruoka, K.; Sodeoka, M. *ACS Med. Chem. Lett.* **2013**, *4*, 730–735.
